# Supplementary material
Source: PubMed Central journal article supplement (PMC6667794)

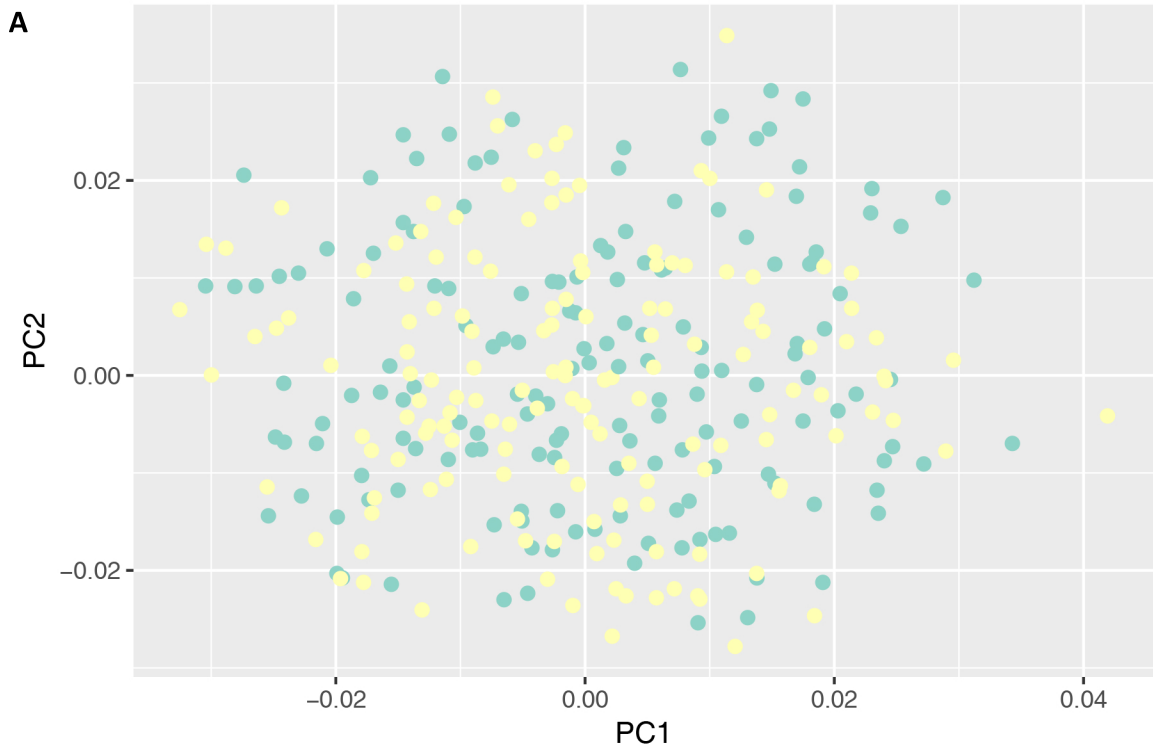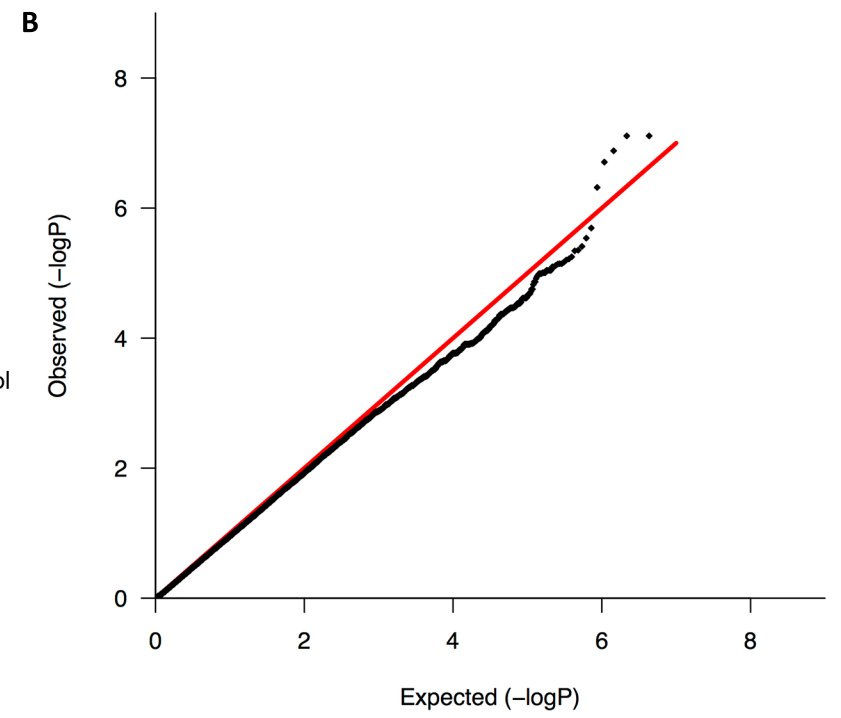

Supplement: jiz206_suppl_supplementary_figure_1.pdf [file jiz206_suppl_supplementary_figure_1.pdf]

**A**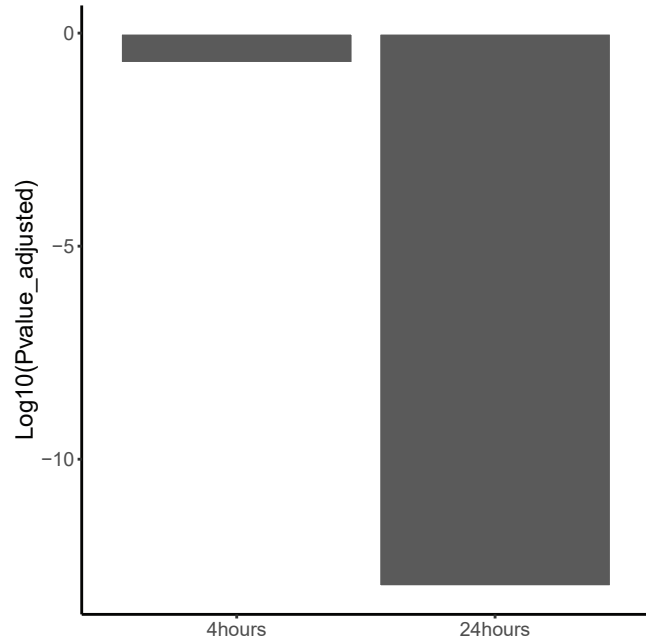**B**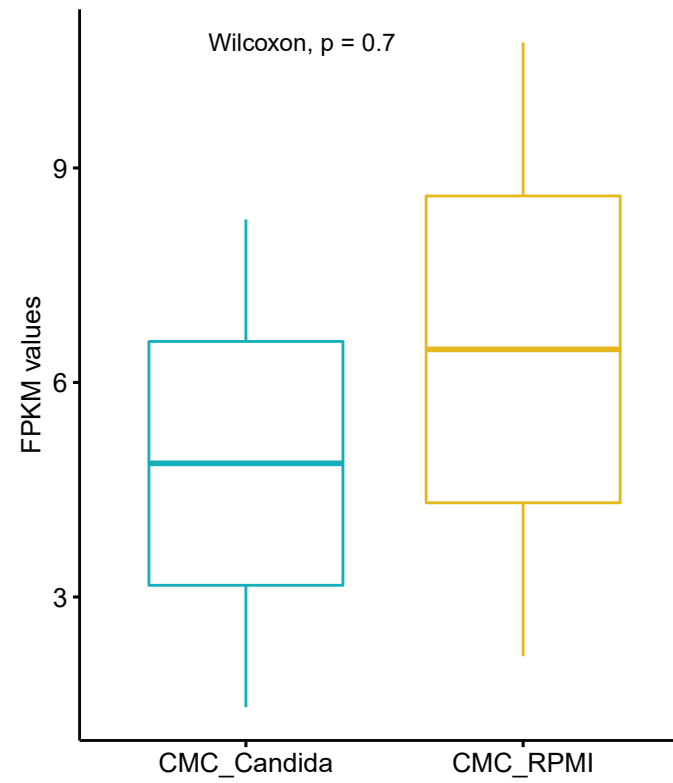**C**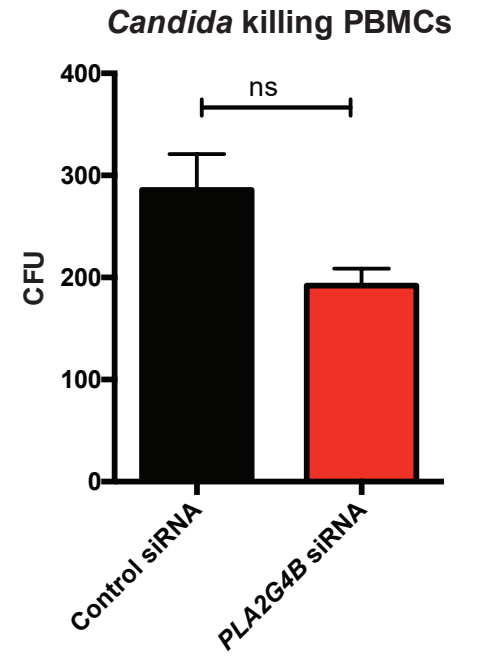

Supplement: jiz206_suppl_supplementary_figure_2.pdf [file jiz206_suppl_supplementary_figure_2.pdf]

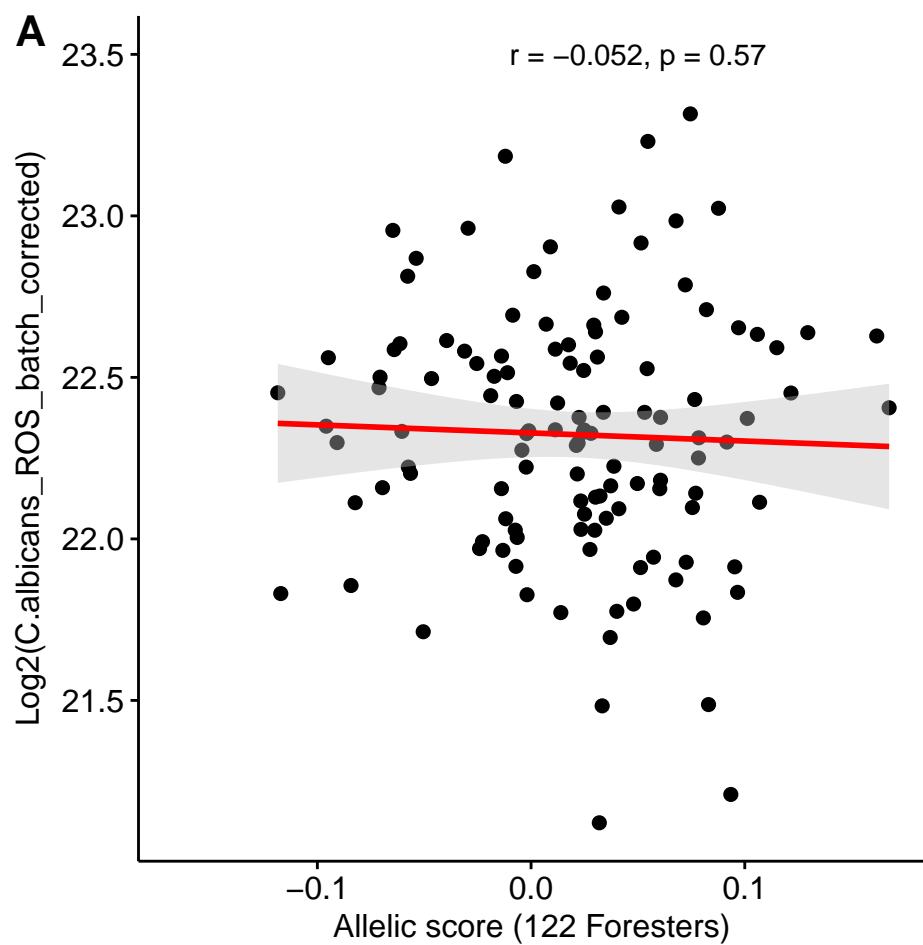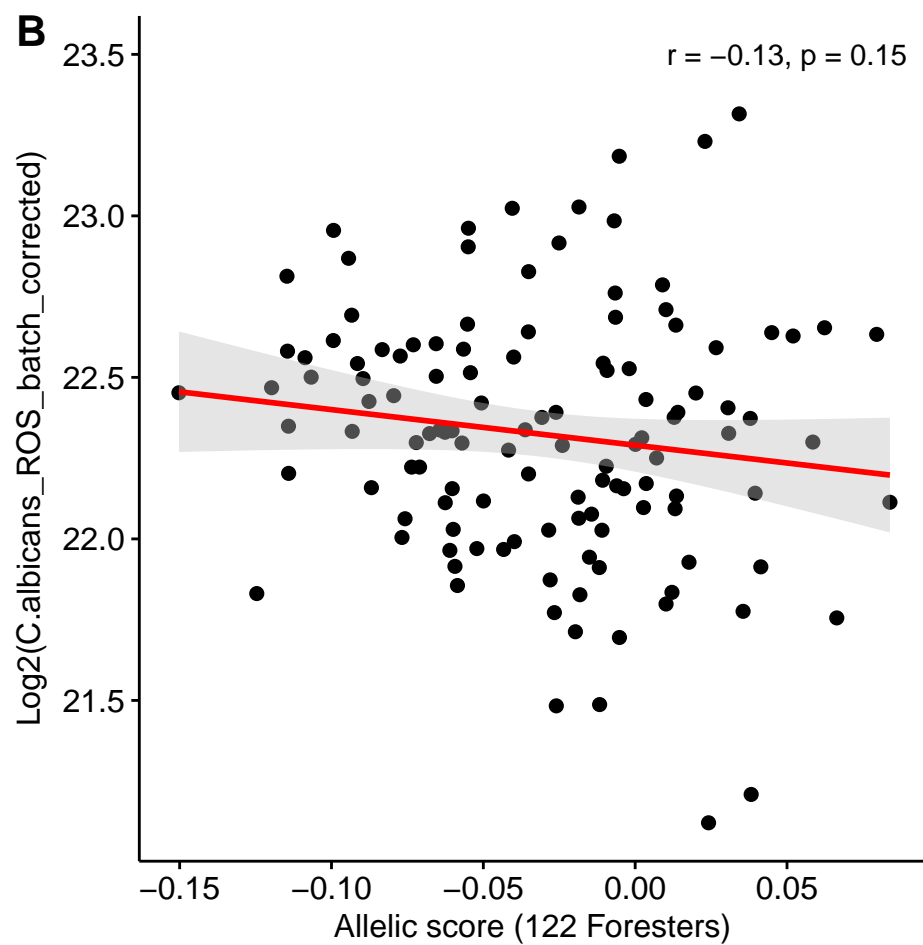

Supplement: jiz206_suppl_supplementary_figure_3.pdf [file jiz206_suppl_supplementary_figure_3.pdf]

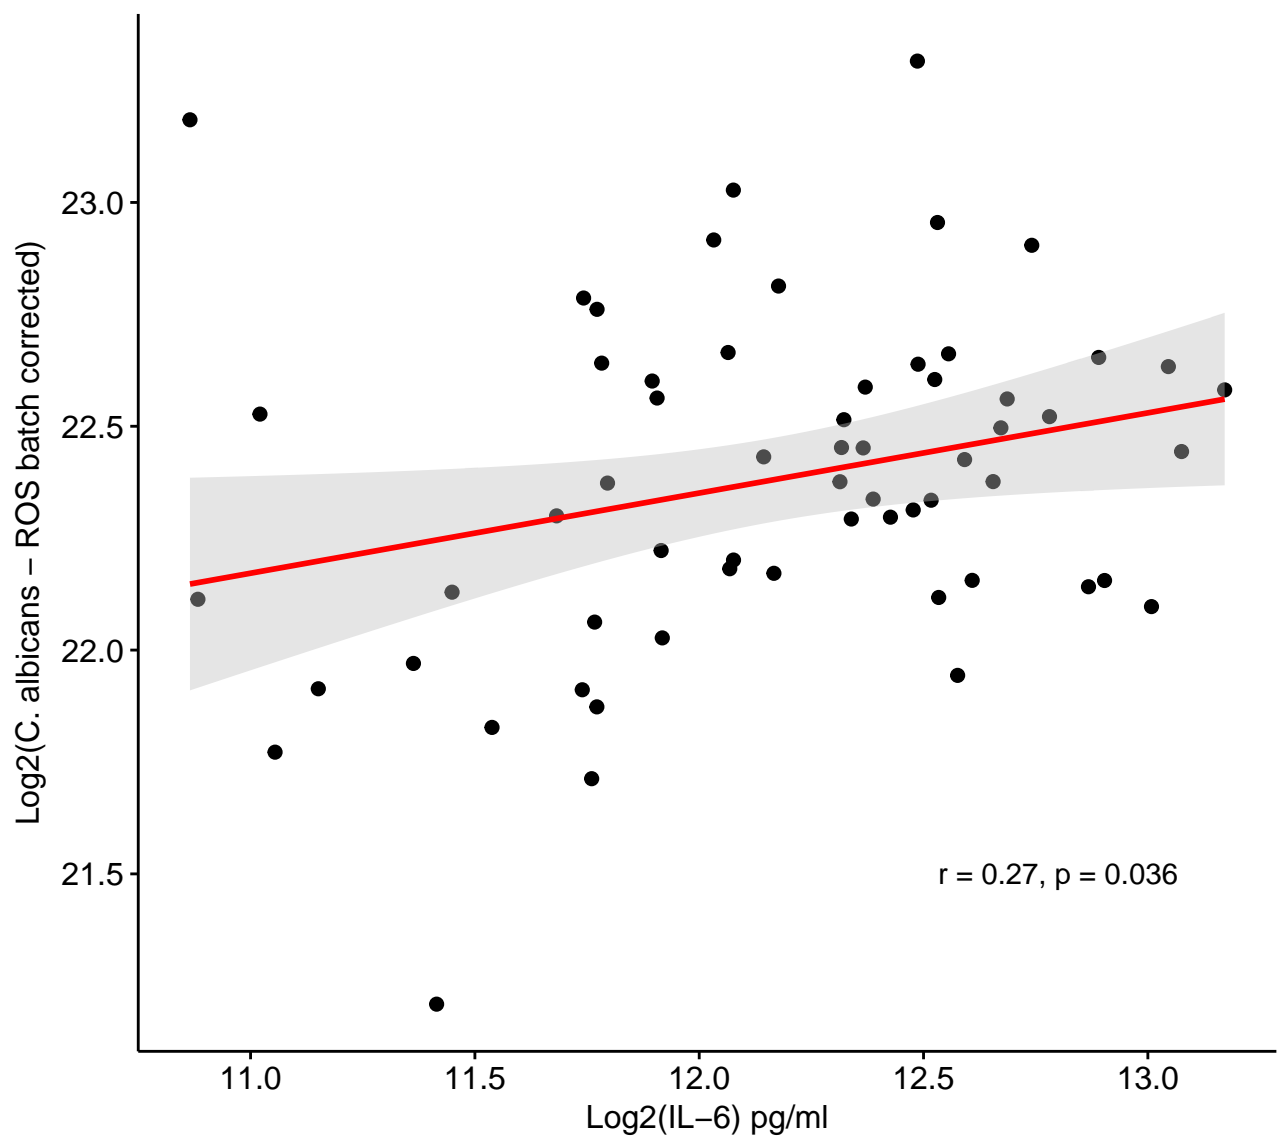

Supplement: jiz206_suppl_supplementary_figure_4.pdf [file jiz206_suppl_supplementary_figure_4.pdf]
